# Supplementary material
Source: PubMed Central journal article supplement (PMC4367099)
Supplement: cei0180-0108-sd1.pdf [file cei0180-0108-sd1.pdf]

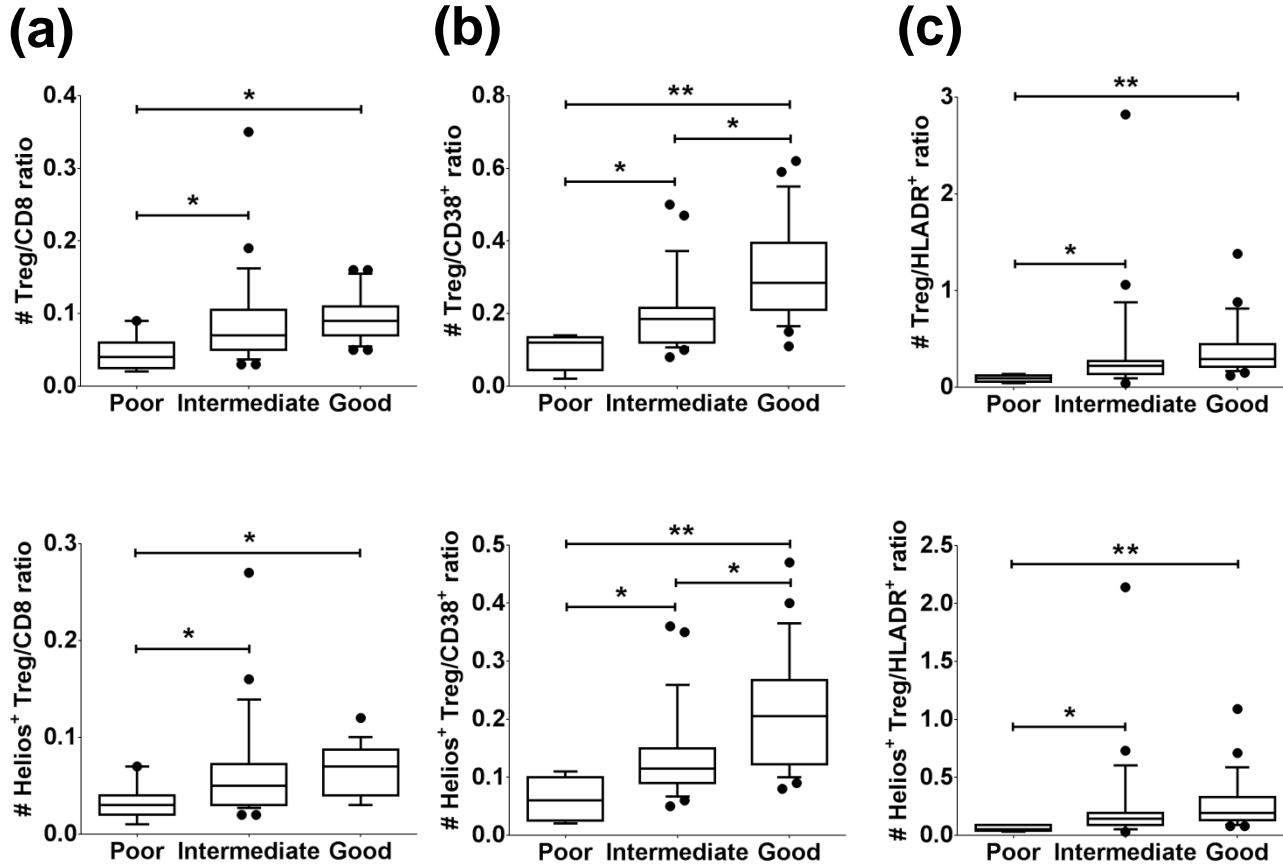

**Supplemental Fig. 1.** Difference in the ratio of Treg and Helios+ Treg to (A) CD8, (B) CD8+CD38+ and (C) CD8+HLADR+ within the poor, intermediate and good HIV status groups. \* P<0.05, \*\* P<0.001
